# Supplementary material for: Comparative Cytotoxic Effects and Possible Mechanisms of Deoxynivalenol, Zearalenone and T-2 Toxin Exposure to Porcine Leydig Cells In Vitro
Source: MDPI journal article supplement (doi:10.3390/toxins14020113), 2022-02-02
Supplement: s1 [file s1]

**Table S1.** Mycotoxins concentrations used in presented study.

| Toxins | Concentrations | Concentrations (ng/mL) |
|--------|----------------|------------------------|
| ZEN    | 5 $\mu$ M      | 1591.8                 |
|        | 10 $\mu$ M     | 3183.6                 |
|        | 25 $\mu$ M     | 7959                   |
|        | 50 $\mu$ M     | 15918                  |
|        | 75 $\mu$ M     | 11938.5                |
|        | 100 $\mu$ M    | 31836                  |
|        | 200 $\mu$ M    | 63672                  |
| DON    | 0.125 $\mu$ M  | 37.04                  |
|        | 0.25 $\mu$ M   | 74.08                  |
|        | 0.5 $\mu$ M    | 148.16                 |
|        | 1 $\mu$ M      | 296.32                 |
|        | 2 $\mu$ M      | 592.64                 |
|        | 4 $\mu$ M      | 1185.28                |
|        | 8 $\mu$ M      | 2370.56                |
| T-2    | 25 nM          | 11.66                  |
|        | 50 nM          | 23.33                  |
|        | 75 nM          | 34.99                  |
|        | 100 nM         | 46.65                  |
|        | 125 nM         | 58.31                  |
|        | 150 nM         | 69.98                  |
|        | 175 nM         | 81.64                  |

Abbreviations. ZEN: zearalenone; DON: deoxynivalenol; T-2: T-2 toxin.
